# Supplementary material for: Integrative clustering of multi-level ‘omic data based on non-negative matrix factorization algorithm
Source: PubMed Central journal article supplement (PMC5411077; doi:10.1371/journal.pone.0176278), 2017-05-01
Supplement: pone.0176278.s001.pdf [file pone.0176278.s001.pdf]

## Supplementary Materials

### 1. Derivation of solution for common $W$ matrix:

Suppose  $\mathbf{X}^i$ ,  $i=1, 2, \dots, m$  be matrices representing  $m$  types of genomic assays profiled on same set of  $n$  samples with  $p_i$  features,  $\mathbf{W}$  be the common basis matrix,  $\mathbf{H}^i$ ,  $i=1, \dots, m$  be the individual data specific coefficient matrices and  $\theta^i \geq 0$ ,  $i=1, \dots, m$  be the weights for several data types. Then we can write

$$\mathbf{X}_{n \times p_i}^i \approx \mathbf{W}_{n \times k} \mathbf{H}_{k \times p_i}^i \quad i = 1, 2, \dots, m$$

Where  $\mathbf{W}_{n \times k} \geq 0$ ,  $\mathbf{H}_{k \times p_i}^i \geq 0$ ,  $i = 1, 2, \dots, m$

The intNMF problem minimizes the following objective function

$$Q = \sum_{i=1}^m \theta^i (\mathbf{X}_{n \times p_i}^i - \mathbf{W}_{n \times k} \mathbf{H}_{k \times p_i}^i)^2$$
$$Q = \sum_{i=1}^m [\sqrt{\theta^i} (\mathbf{X}_{n \times p_i}^i - \mathbf{W}_{n \times k} \mathbf{H}_{k \times p_i}^i)]^2$$

There is no global minimum solution for NMF problem. Therefore, it is unrealistic to design an algorithm to find the global minimum of  $Q$ . We derive approximate solution for  $\mathbf{W}$ . Since our objective is to approximately factorize  $\mathbf{X}_{n \times p_i}^i$  in to  $\mathbf{W}_{n \times k}$  and  $\mathbf{H}_{k \times p_i}^i$  matrices for  $i=1, 2, \dots, m$ , and that each of the  $m$  terms in the above equation is strictly positive we can write,

$$\sqrt{\theta^i} (\mathbf{X}_{n \times p_i}^i - \mathbf{W}_{n \times k} \mathbf{H}_{k \times p_i}^i) \approx \mathbf{0}_{n \times p_i}$$

$$\sqrt{\theta^i} \mathbf{X}_{n \times p_i}^i \approx \sqrt{\theta^i} \mathbf{W}_{n \times k} \mathbf{H}_{k \times p_i}^i$$

For simplicity, writing the expression in the form of equation

$$\sqrt{\theta^i} \mathbf{X}_{n \times p_i}^i = \sqrt{\theta^i} \mathbf{W}_{n \times k} \mathbf{H}_{k \times p_i}^i + \mathbf{C}_{n \times p_i}^i$$

Where  $\mathbf{C}_{n \times p_i}^i$  is matrix of constants having small numbers.

Multiplying both sides by transpose of  $\mathbf{H}_{k \times p_i}^i$  and summing over  $i$

$$\sum_{i=1}^m \sqrt{\theta^i} \mathbf{X}_{n \times p_i}^i (\mathbf{H}^i)^T_{p_i \times k} = \sum_{i=1}^m \sqrt{\theta^i} \mathbf{W}_{n \times k} \mathbf{H}_{k \times p_i}^i (\mathbf{H}^i)^T_{p_i \times k} + \sum_{i=1}^m \mathbf{C}_{n \times p_i}^i (\mathbf{H}^i)^T_{p_i \times k}$$

$$\sum_{i=1}^m \sqrt{\theta^i} \mathbf{X}_{n \times p_i}^i (\mathbf{H}^i)^T_{p_i \times k} = \sum_{i=1}^m \sqrt{\theta^i} \mathbf{W}_{n \times k} \mathbf{H}_{k \times p_i}^i (\mathbf{H}^i)^T_{p_i \times k} + \mathbf{C}'_{n \times k}$$

Where,  $\mathbf{C}'_{n \times k} = \sum_{i=1}^m \mathbf{C}_{n \times p_i}^i (\mathbf{H}^i)^T_{p_i \times k}$  is a constant. Note that  $\mathbf{H}^i$ ,  $i=1, \dots, m$  are computed separately.

$$\sum_{i=1}^m \sqrt{\theta^i} \mathbf{X}_{n \times p_i}^i (\mathbf{H}^i)^T_{p_i \times k} = \mathbf{W}_{n \times k} \sum_{i=1}^m \sqrt{\theta^i} (\mathbf{H}^i (\mathbf{H}^i)^T)_{k \times k} + \mathbf{C}'_{n \times k}$$

$$\mathbf{W}_{n \times k} = \left( \sum_{i=1}^m \sqrt{\theta^i} \mathbf{X}_{n \times p_i}^i (\mathbf{H}^i)^T_{p_i \times k} \right) \left( \sum_{i=1}^m \sqrt{\theta^i} (\mathbf{H}^i (\mathbf{H}^i)^T)_{k \times k} \right)^{-1} - \mathbf{C}'_{n \times k} \left( \sum_{i=1}^m \sqrt{\theta^i} (\mathbf{H}^i (\mathbf{H}^i)^T)_{k \times k} \right)^{-1}$$

$$\mathbf{W}_{k \times n}^T = \left[ \left( \sum_{i=1}^m \sqrt{\theta^i} \mathbf{X}_{n \times p_i}^i (\mathbf{H}^i)^T_{p_i \times k} \right) \left( \sum_{i=1}^m \sqrt{\theta^i} (\mathbf{H}^i (\mathbf{H}^i)^T)_{k \times k} \right)^{-1} \right]^T + \mathbf{C}''_{k \times n}$$

Where  $\mathbf{C}''_{k \times n} = \left[ -\mathbf{C}'_{n \times k} \left( \sum_{i=1}^m \sqrt{\theta^i} (\mathbf{H}^i (\mathbf{H}^i)^T)_{k \times k} \right)^{-1} \right]^T$  constant matrix. Writing back in approximate form,

$$\mathbf{W}_{k \times n}^T \approx \left[ \left( \sum_{i=1}^m \sqrt{\theta^i} (\mathbf{H}^i (\mathbf{H}^i)^T)_{k \times k} \right)^T \right]^{-1} \left[ \left( \sum_{i=1}^m \sqrt{\theta^i} \mathbf{X}_{n \times p_i}^i (\mathbf{H}^i)^T_{p_i \times k} \right)^T \right]$$

This equation can be solved using non negative alternating least square method. Finally  $\mathbf{W}_{n \times k}$  is obtained by the transpose of  $\mathbf{W}_{k \times n}^T$ .

## 2. Solution for H matrices

$\mathbf{H}^i$ ,  $i=1, \dots, m$  matrices are solved using non-negativity constraint least square method.

$$\mathbf{H}_{k \times p_i}^i \approx (\mathbf{W}^T \mathbf{W})_{k \times k}^{-1} \mathbf{W}_{k \times n}^T \mathbf{X}_{n \times p_i}^i \quad i = 1, 2, \dots, m$$

such that  $\mathbf{H}_{k \times p_i}^i \geq 0$

### 3. Convergence of intNMF to standard NMF when $m \rightarrow 1$

For,  $i=1, \dots, m$  the solution for  $W$  is given by

$$\mathbf{W}_{k \times n}^T \approx \left[ \left( \sum_{i=1}^m \sqrt{\theta^i} (\mathbf{H}^i (\mathbf{H}^i)^T)_{k \times k} \right)^T \right]^{-1} \left[ \left( \sum_{i=1}^m \sqrt{\theta^i} \mathbf{X}_{n \times p_i}^i (\mathbf{H}^i)^T_{p_i \times k} \right)^T \right]$$

If  $m \rightarrow 1$ ,

$$\mathbf{W}_{k \times n}^T \approx \left[ \left( \sum_{i=1}^1 \sqrt{\theta^i} (\mathbf{H}^i (\mathbf{H}^i)^T)_{k \times k} \right)^T \right]^{-1} \left[ \left( \sum_{i=1}^1 \sqrt{\theta^i} \mathbf{X}_{n \times p_i}^i (\mathbf{H}^i)^T_{p_i \times k} \right)^T \right]$$

There is no need of weight for a single data. i.e.  $\theta^i \rightarrow 1$

$$\begin{aligned} \mathbf{W}_{k \times n}^T &\approx \left[ \left( \sum_{i=1}^1 \sqrt{1} (\mathbf{H}^i (\mathbf{H}^i)^T)_{k \times k} \right)^T \right]^{-1} \left[ \left( \sum_{i=1}^1 \sqrt{1} \mathbf{X}_{n \times p_i}^i (\mathbf{H}^i)^T_{p_i \times k} \right)^T \right] \\ &= [(\mathbf{H}^1 (\mathbf{H}^1)^T)_{k \times k}]^{-1} [(\mathbf{X}_{n \times p_1}^1 (\mathbf{H}^1)^T_{p_1 \times k})^T] \\ &= (\mathbf{H}^1 (\mathbf{H}^1)^T)_{k \times k}^{-1} \mathbf{H}_{k \times p_1}^1 (\mathbf{X}^1)_{p_1 \times n}^T \end{aligned}$$

Which is solution of

$$\begin{aligned} (\mathbf{X}^1)_{p_1 \times n}^T &\approx (\mathbf{H}^1)_{p_1 \times k}^T \mathbf{W}_{k \times n}^T \\ \Rightarrow \mathbf{X}_{n \times p_1}^1 &\approx \mathbf{W}_{n \times k} \mathbf{H}_{k \times p_1}^1 \end{aligned}$$

For simplicity, writing  $p$  for  $p_1$ ,  $\mathbf{X}$  for  $\mathbf{X}^1$  and  $\mathbf{H}$  for  $\mathbf{H}^1$ .

$$\mathbf{X}_{n \times p} \approx \mathbf{W}_{n \times k} \mathbf{H}_{k \times p}$$

Which is standard NMF problem.

(Complete set of supplementary figures are provided separately with **S2 File. Complete set of Supplementary Figures**).
