# Supplementary material for: Integrative clustering of multi-level ‘omic data based on non-negative matrix factorization algorithm
Source: PubMed Central journal article supplement (PMC5411077; doi:10.1371/journal.pone.0176278), 2017-05-01

### Effect size = 3.5

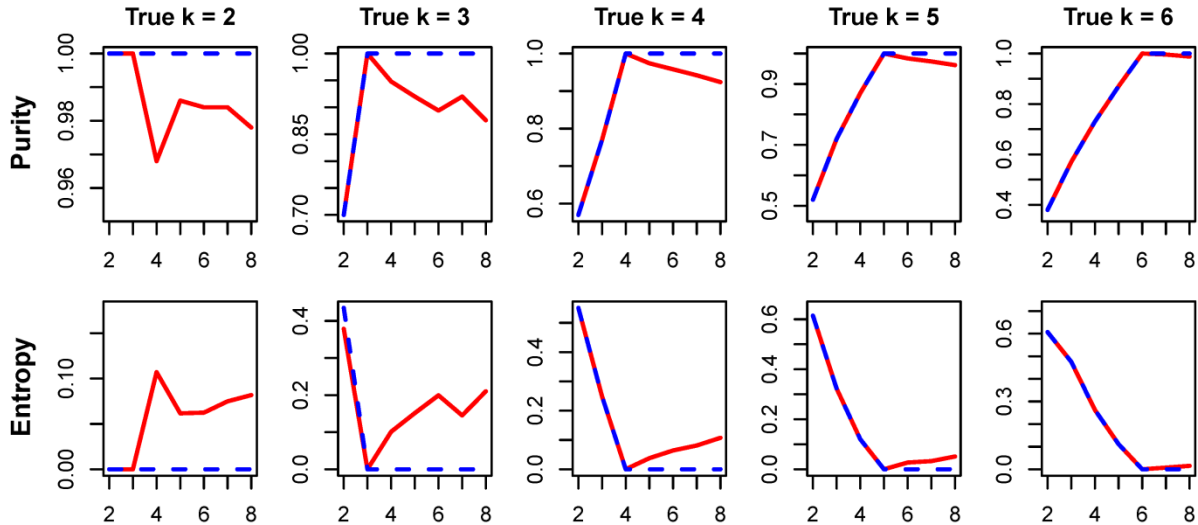

Supplement: pone.0176278.s006.pdf [file pone.0176278.s006.pdf]
