# Supplementary material for: Integrative clustering of multi-level ‘omic data based on non-negative matrix factorization algorithm
Source: PubMed Central journal article supplement (PMC5411077; doi:10.1371/journal.pone.0176278), 2017-05-01
Supplement: pone.0176278.s011.pdf [file pone.0176278.s011.pdf]

| <b>TCGA</b>          | <b>iCluster Subtypes</b> |           |            | <b>Total</b> |
|----------------------|--------------------------|-----------|------------|--------------|
|                      | <b>C1</b>                | <b>C2</b> | <b>C3</b>  |              |
| <b>(1) HER2</b>      | 14                       | 8         | 17         | <b>39</b>    |
| <b>(2) Basal</b>     | 5                        | 65        | 2          | <b>72</b>    |
| <b>(3) Luminal A</b> | 89                       | 4         | 68         | <b>161</b>   |
| <b>(4) Luminal B</b> | 8                        | 0         | 68         | <b>76</b>    |
| <b>Total</b>         | <b>116</b>               | <b>77</b> | <b>155</b> | <b>348</b>   |
